# Supplementary material
Source: PubMed Central journal article supplement (PMC3406128)
Supplement: AEM.00327-12_zam999103545so1.pdf [file AEM.00327-12_zam999103545so1.pdf]

1

## Supplementary Materials

2

**Fig. S1 In-house program used for processing of raw pyrosequencing data and**

3

**analysis of the pyrosequencing data at species level.**

4

5

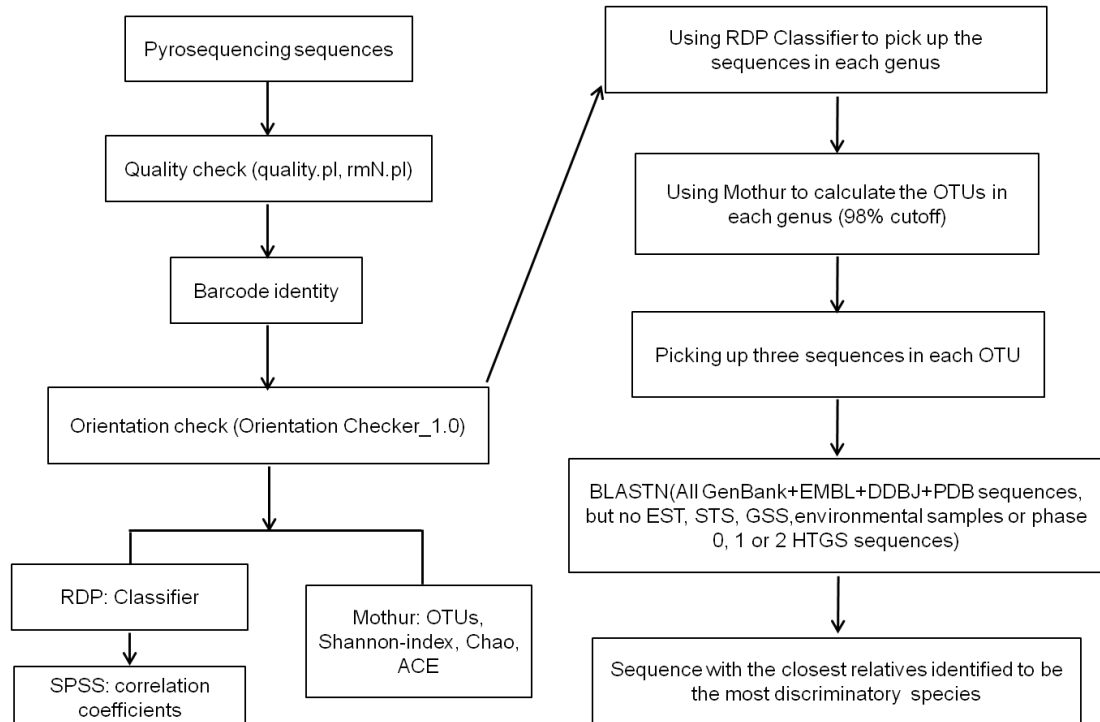

6 **Fig. S2 PCR-DGGE profiles of duplicated chemostat experiments conducted**  
7 **under the same operation conditions with two inocula collected from the same**  
8 **donor at ten months intermittence. A. DGGE profile of V3 region of 16S rRNA**  
9 **gene<sup>a</sup>; B. Phylogenetic tree based on UPGMA method analyzed by Quantity One.**  
10 <sup>a</sup>HU08 and HU09 represent the different fecal inocula of the same donor collected in  
11 2008 and 2009. HF represents the chemostat samples inoculated with human feces.  
12 08VI, 09VI, 08VL and 09VL represent the chemostat samples cultured with VI and  
13 VL media in 2008 and 2009. M represents markers used for DGGE profiles.

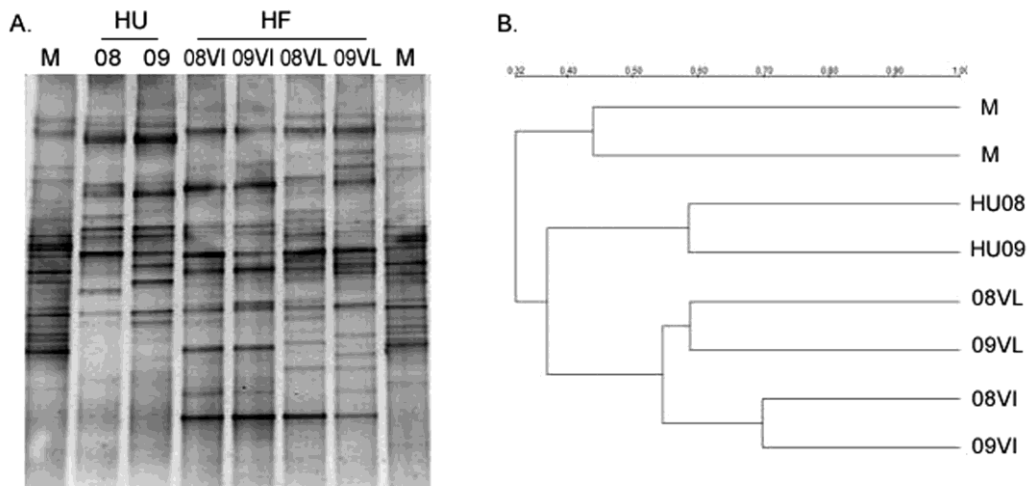

14

15

16 **Fig. S3 The microbiota compositions analyzed by 454 pyrosequencing<sup>a</sup>.**

17 <sup>a</sup>Samples were collected from duplicated chemostat experiments conducted under the  
 18 same operation conditions with two human fecal inocula taken from the same donor at  
 19 ten months intermittence. HU08 and HU09 represent the different fecal inocula of the  
 20 same donor collected in 2008 and 2009. HF08VI, HF09VI, HF08VL and HF09VL  
 21 represent the chemostats samples with VI and VL media conducted in 2008 and 2009.  
 22 Un represents unclassified.

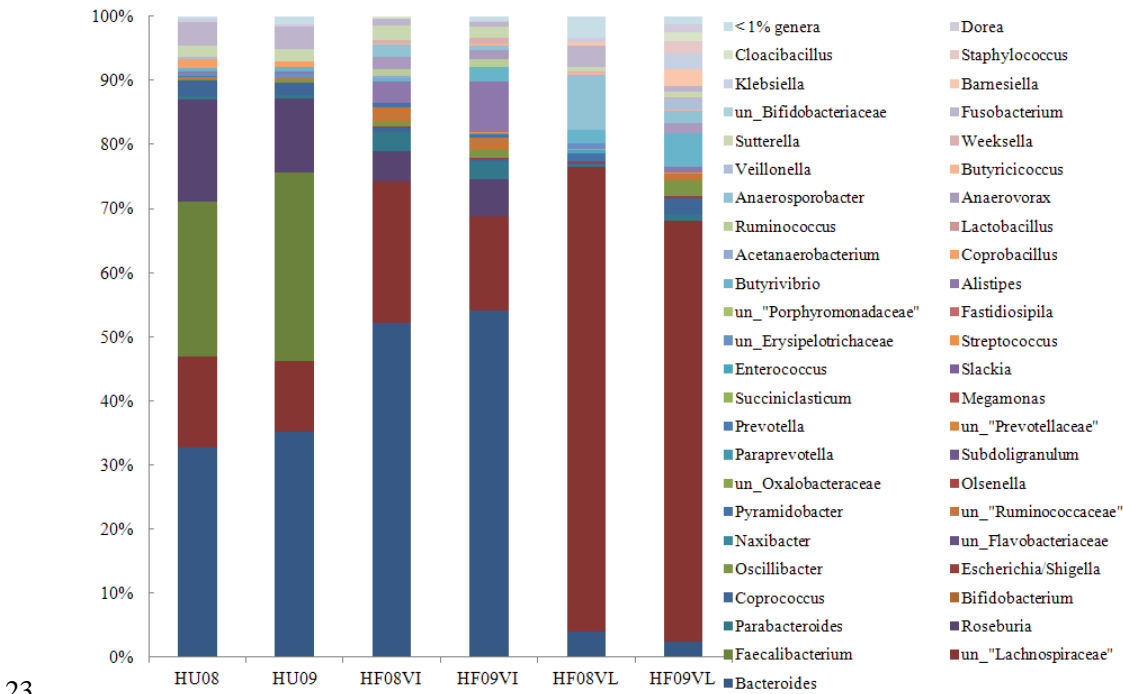

23

24

25 **Fig. S4 The effect of sequencing reads on the patterns of human fecal microbiota**  
 26 **compositions<sup>a</sup>.**

27 <sup>a</sup>Pearson correlation between samples was analyzed by SPSS software based on the  
 28 percentage of each bacterial classification unit at genus levels. Un represents  
 29 unclassified.

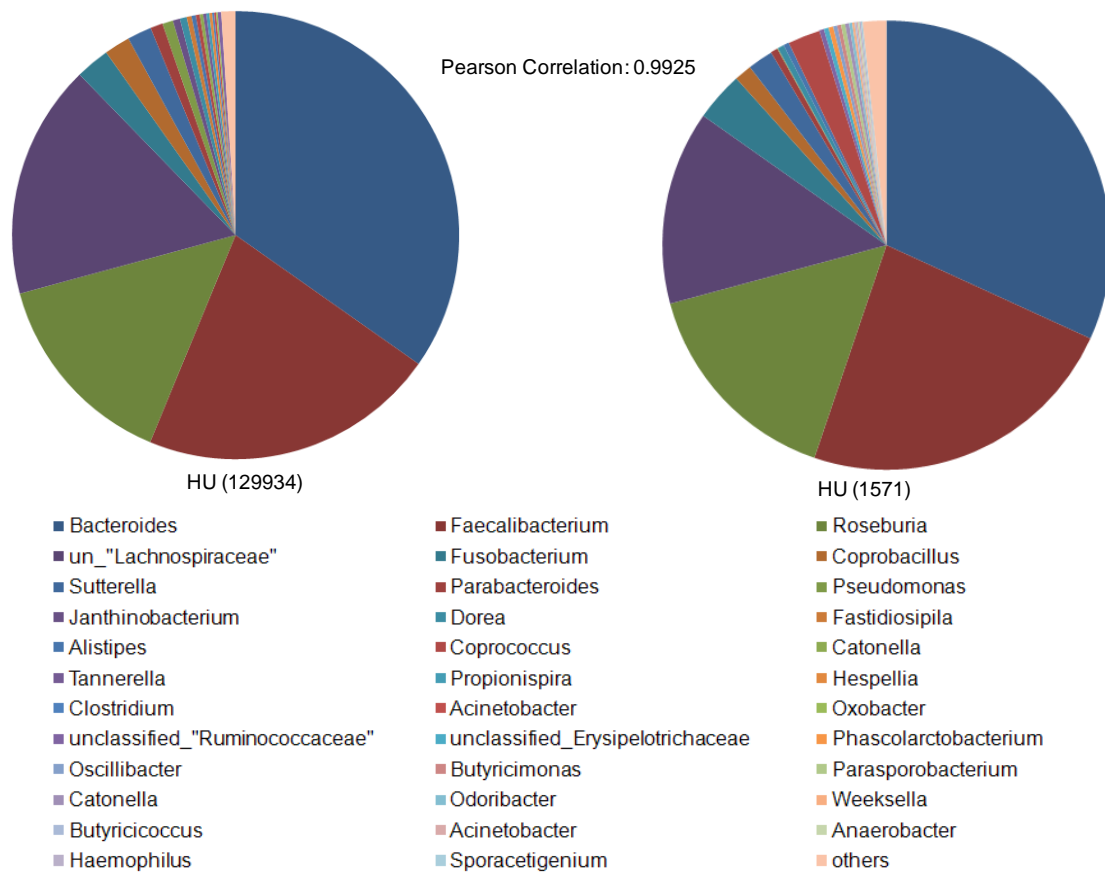

30

31 **Table S1 PCR primers used for qPCR assay.**

| Target bacterial group                                   | Primer name | Primer sequence (5'-3')   | Amplicon size (bp) | Annealing temp ( °C) | Reference |
|----------------------------------------------------------|-------------|---------------------------|--------------------|----------------------|-----------|
| Total bacteria                                           | Bac1114F    | CGGCAACGAGCGCAACCC        | 161                | 66                   | (5)       |
|                                                          | Bac1275R    | CCATTGTAGCACGTGTGTAGCC    |                    |                      |           |
| <i>Bacteroides</i> group                                 | Bfra-F      | ATAGCCTTTCGAAAGRAAGAT     | 495                | 50                   | (8)       |
|                                                          | Bfra-R      | CCAGTATCAACTGCAATTTTA     |                    |                      |           |
| <i>Clostridium</i><br><i>coccoides–Eubacterium</i> group | CcocF       | CGGTACCTGACTAAGAAGC       | 429                | 55                   | (11)      |
|                                                          | CcocR       | AGTTYATTCTTGCGAACG        |                    |                      |           |
| <i>Enterobacteriaceae</i>                                | Eco1457F    | CATTGACGTTACCCGCAGAAGAAGC | 195                | 63                   | (1)       |
|                                                          | Eco1652R    | CTCTACGAGACTCAAGCTTGC     |                    |                      |           |
| <i>Bifidobacterium</i> genus                             | Bif164F     | GGGTGGTAATGCCGGATG        | 437                | 59                   | (1)       |
|                                                          | Bif601R     | TAAGCCATGGACTTTCACACC     |                    |                      |           |
| <i>Lactobacillus</i> group                               | LactoF      | TGGAAACAGRTGCTAATACCG     | 233                | 62                   | (6)       |
|                                                          | LactoR      | GTCCATTGTGGAAGATTCCC      |                    |                      |           |

32

33 **Table S2 Basic information for biodiversity analysis of pyrosequencing<sup>a</sup>.**

| Subjects <sup>b</sup>   | HU     | HFVI   | HFVL   | CH     | CFVI   | CFVL   |
|-------------------------|--------|--------|--------|--------|--------|--------|
| No of sequences         | 1751   | 1456   | 1043   | 1684   | 1643   | 1082   |
| No of OTUs (98% cutoff) | 141    | 143    | 96     | 308    | 69     | 91     |
| ACE                     | 280.58 | 221.04 | 247.65 | 864.66 | 173.71 | 218.92 |
| Shannon                 | 3.38   | 3.38   | 2.35   | 4.75   | 1.46   | 2.7    |
| Chao                    | 200.04 | 204.11 | 172.56 | 568.55 | 128.5  | 164.93 |
| Evenness <sup>c</sup>   | 0.45   | 0.46   | 0.34   | 0.64   | 0.20   | 0.39   |
| Good's coverage (%)     | 96.69  | 95.95  | 95.21  | 90.68  | 97.87  | 95.75  |

34 <sup>a</sup>Basic information calculated using Mothur (version 1.11.0).

35 <sup>b</sup>HU and CH represent inocula of human feces and chicken cecal contents. HFVI,  
 36 HFVL, CFVI and CFVL represent chemostat products of human fecal and chicken  
 37 cecal microbiota grown in VI and VL media.

38 <sup>c</sup>The Shannon index of evenness was calculated with the formula  $E = H/\ln(S)$ , where  
 39 H is the Shannon diversity index and S is the total number of sequences in that group.

40 **Table S3 Comparative composition of major genera at species level between human fecal and chicken cecal microbiota<sup>a</sup>**

| <b>Genus</b>                        | <b>HU<sup>b</sup></b>               |        | <b>CH<sup>b</sup></b>               |        |
|-------------------------------------|-------------------------------------|--------|-------------------------------------|--------|
| <i>Faecalibacterium</i>             | <i>Faecalibacterium prausnitzii</i> | 23.47% | <i>Faecalibacterium prausnitzii</i> | 7.66%  |
| <i>Bacteroides</i>                  | <i>Bacteroides vulgatus</i>         | 31.88% | <i>Bacteroides plebeius</i>         | 6.77%  |
|                                     |                                     |        | <i>Bacteroides uniformis</i>        | 1.43%  |
|                                     |                                     |        | <i>Bacteroides clarus</i>           | 1.71%  |
|                                     |                                     |        | <i>Bacteroides faecis</i>           | 0.95%  |
|                                     |                                     |        | <i>Bacteroides barnesiae</i>        | 0.51%  |
|                                     |                                     |        |                                     | 11.37% |
| <b>Unclassified Lachnospiraceae</b> | <i>Eubacterium eligens</i>          | 1.00%  | <i>Eubacterium xylanophilum</i>     | 3.38%  |
|                                     | <i>Eubacterium fissicatena</i>      | 0.86%  | <i>Eubacterium fissicatena</i>      | 0.83%  |
|                                     | <i>Eubacteriaceae bacterium</i>     | 1.14%  | <i>Ruminococcus gnavus</i>          | 0.48%  |
|                                     | <i>Butyrate-producing bacterium</i> | 0.69%  | <i>Coprococcus comes</i>            | 0.48%  |
|                                     | <i>Eggerthella lenta</i>            | 1.88%  |                                     |        |
|                                     | <i>Lachnospira pectinoschiza</i>    | 5.54%  |                                     |        |
|                                     | <i>Lachnospiraceae bacterium</i>    | 1.58%  | <i>Clostridium methylpentosum</i>   | 0.47%  |
|                                     | <i>Clostridium saccharolyticum</i>  | 0.99%  | <i>Clostridium hathewayi</i>        | 0.36%  |
|                                     | <i>Clostridium populeti</i>         | 0.29%  | <i>Clostridium populeti</i>         | 1.66%  |
|                                     |                                     |        |                                     | 7.66%  |
| <i>Parabacteroides</i>              | <i>Parabacteroides merdae</i>       | 0.34%  | <i>Parabacteroides merdae</i>       | 11.46% |
|                                     | <i>Parabacteroides distasonis</i>   | 0.18%  | <i>Parabacteroides johnsonii</i>    | 2.08%  |
|                                     |                                     | 0.52%  |                                     | 13.54% |
| <i>Roseburia</i>                    | <i>Roseburia intestinalis</i>       | 15.63% | <i>Roseburia faecis</i>             | 3.21%  |

41 <sup>a</sup> Sequences with 98% similarity are regarded as the same OTU.

42 <sup>b</sup> HU, human fecal microbiota; CH, chicken cecal microbiota.



43 **Table S4 Comparative microbiota compositions of human fecal and chicken cecal**  
 44 **inocula and their corresponded chemostat products grown in VI and VL media**  
 45 **at genus level<sup>a</sup>**

| Genus                            | % in total sequences |       |       |       |       |       |
|----------------------------------|----------------------|-------|-------|-------|-------|-------|
|                                  | HU <sup>b</sup>      | HFVI  | HFVL  | CH    | CFVI  | CFVL  |
| <i>Parabacteroides</i>           | 0.51                 | 2.95  | 0.38  | 11.76 | 0     | 0.46  |
| <i>Bacteroides</i>               | 31.81                | 50.62 | 3.84  | 9.98  | 0.12  | 12.85 |
| unclassified Lachnospiraceae     | 13.94                | 21.43 | 70.76 | 6.83  | 0     | 4.07  |
| <i>Faecalibacterium</i>          | 23.42                | 0     | 0     | 6.65  | 0     | 0.19  |
| <i>Naxibacter</i>                | 0                    | 0     | 0     | 5.17  | 0     | 0     |
| unclassified Ruminococcaceae     | 0.34                 | 2.20  | 0     | 3.27  | 0     | 8.97  |
| <i>Olsenella</i>                 | 0                    | 0     | 0     | 3.09  | 0     | 0     |
| unclassified Oxalobacteraceae    | 0                    | 0     | 0     | 3.09  | 0     | 0     |
| <i>Roseburia</i>                 | 15.59                | 4.46  | 0     | 2.79  | 0     | 0.09  |
| <i>Subdoligranulum</i>           | 0                    | 0     | 0     | 2.32  | 0     | 3.51  |
| <i>Paraprevotella</i>            | 0                    | 0     | 0     | 2.26  | 0     | 0.000 |
| <i>Escherichia/Shigella</i>      | 0                    | 0.07  | 0.10  | 2.14  | 0.06  | 0.09  |
| <i>Oscillibacter</i>             | 0.29                 | 0.76  | 0     | 2.08  | 0.06  | 9.98  |
| unclassified Flavobacteriaceae   | 0                    | 0.07  | 0.10  | 2.02  | 0     | 0     |
| unclassified Prevotellaceae      | 0                    | 0     | 0     | 1.96  | 0     | 0.19  |
| <i>Prevotella</i>                | 0.06                 | 0     | 0     | 1.84  | 0     | 4.71  |
| <i>Megamonas</i>                 | 0                    | 0     | 0     | 1.54  | 0     | 0     |
| <i>Succiniclasicum</i>           | 0                    | 0     | 0     | 1.49  | 0     | 0     |
| unclassified Erysipelotrichaceae | 0.34                 | 0.07  | 0.86  | 1.37  | 0     | 0.09  |
| <i>Enterococcus</i>              | 0                    | 0     | 0.48  | 1.37  | 0     | 0     |
| <i>Streptococcus</i>             | 0                    | 0     | 0.10  | 1.37  | 0     | 0     |
| <i>Slackia</i>                   | 0                    | 0     | 0     | 1.37  | 0     | 0     |
| <i>Fastidiosipila</i>            | 0                    | 0     | 0     | 1.31  | 0     | 15.62 |
| unclassified Porphyromonadaceae  | 0                    | 0     | 0     | 0.95  | 0     | 4.62  |
| <i>Cloacibacillus</i>            | 0                    | 0.28  | 0     | 0.71  | 0     | 0     |
| <i>Janthinobacterium</i>         | 0                    | 0     | 0.19  | 0.65  | 0     | 0.19  |
| <i>Alistipes</i>                 | 0.40                 | 3.30  | 0.    | 0.59  | 0     | 0     |
| <i>Bifidobacterium</i>           | 0                    | 0     | 0     | 0.53  | 79.37 | 0     |
| unclassified Comamonadaceae      | 0                    | 0     | 0     | 0.53  | 0     | 0     |
| unclassified Coriobacteriaceae   | 0                    | 0     | 0     | 0.48  | 0.06  | 0     |
| <i>Massilia</i>                  | 0                    | 0     | 0     | 0.48  | 0     | 0     |
| <i>Coprococcus</i>               | 2.34                 | 0.69  | 0.19  | 0.36  | 0     | 2.96  |
| <i>Eubacterium</i>               | 0                    | 0     | 0     | 0.36  | 0     | 0     |
| <i>Pseudomonas</i>               | 0.06                 | 0     | 0.10  | 0.30  | 0.24  | 0     |
| <i>Hespellia</i>                 | 0.06                 | 0     | 0     | 0.30  | 0     | 0     |
| <i>Collinsella</i>               | 0                    | 0     | 0     | 0.30  | 0     | 0     |

|                                         |      |      |      |      |      |      |
|-----------------------------------------|------|------|------|------|------|------|
| <i>Butyricoccus</i>                     | 0.11 | 0.14 | 0.29 | 0.24 | 0    | 0.92 |
| <i>Blautia</i>                          | 0.57 | 0    | 0.38 | 0.24 | 0    | 0    |
| <i>Methylobacterium</i>                 | 0.06 | 0    | 0    | 0.24 | 0    | 0    |
| <i>Peptococcus</i>                      | 0    | 0    | 0    | 0.24 | 0    | 0    |
| <i>Marvinbryantia</i>                   | 0    | 0    | 0    | 0.24 | 0    | 0    |
| <i>Pseudoramibacter</i>                 | 0    | 0    | 0    | 0.24 | 0    | 0    |
| <i>Butyrivibrio</i>                     | 0.57 | 0.41 | 2.01 | 0.18 | 0    | 0.28 |
| <i>Desulfonatronum</i>                  | 0    | 0    | 0    | 0.18 | 0    | 0.19 |
| <i>Coprobacillus</i>                    | 1.26 | 0    | 0    | 0.18 | 0    | 0    |
| <i>Catenibacterium</i>                  | 0    | 0    | 0.10 | 0.18 | 0    | 0    |
| <i>Hallella</i>                         | 0    | 0    | 0    | 0.18 | 0    | 0    |
| <b>unclassified Veillonellaceae</b>     | 0    | 0    | 0    | 0.18 | 0    | 0    |
| <i>Acetanaerobacterium</i>              | 0    | 0.34 | 0    | 0.12 | 0    | 2.31 |
| <i>Moryella</i>                         | 0    | 0    | 0    | 0.12 | 0    | 0    |
| <i>Lactococcus</i>                      | 0    | 0    | 0.77 | 0.06 | 0    | 0.09 |
| <i>Dorea</i>                            | 0.46 | 0    | 0.77 | 0.06 | 0    | 0    |
| <i>Butyricimonas</i>                    | 0.29 | 0    | 0    | 0.06 | 0    | 0    |
| <i>Barnesiella</i>                      | 0    | 0    | 0.38 | 0.06 | 0    | 0    |
| <i>Anaerofilum</i>                      | 0    | 0    | 0    | 0.06 | 0    | 0    |
| <b>TM7</b>                              | 0    | 0    | 0    | 0.06 | 0    | 0    |
| <i>Megasphaera</i>                      | 0    | 0    | 0    | 0.06 | 0    | 0    |
| <b>unclassified Actinosynnemataceae</b> | 0    | 0    | 0    | 0.06 | 0    | 0    |
| <b>unclassified Alcaligenaceae</b>      | 0    | 0    | 0    | 0.06 | 0    | 0    |
| <i>Weeksella</i>                        | 0.17 | 0.55 | 0.10 | 0    | 0    | 9.34 |
| <i>Desulfovibrio</i>                    | 0    | 0    | 0    | 0    | 0    | 0.65 |
| <i>Hydrogenoanaerobacterium</i>         | 0    | 0    | 0    | 0    | 0    | 0.37 |
| <i>Ethanoligenens</i>                   | 0    | 0.07 | 0    | 0    | 0    | 0.19 |
| <i>Clostridium</i>                      | 0    | 0    | 0.67 | 0    | 0.18 | 0.09 |
| <b>unclassified Clostridiaceae 1</b>    | 0    | 0    | 0    | 0    | 0    | 0.09 |
| <i>Veillonella</i>                      | 0.06 | 0    | 0.10 | 0    | 8.34 | 0    |
| <i>Lactobacillus</i>                    | 0    | 0    | 0    | 0    | 7.30 | 0    |
| <b>unclassified Bifidobacteriaceae</b>  | 0    | 0    | 0    | 0    | 3.53 | 0    |
| <i>Alloscardovia</i>                    | 0    | 0    | 0    | 0    | 0.43 | 0    |
| <i>Eggerthella</i>                      | 0    | 0    | 0    | 0    | 0.24 | 0    |
| <i>Fusobacterium</i>                    | 3.54 | 1.10 | 3.26 | 0    | 0    | 0    |
| <i>Sutterella</i>                       | 1.83 | 2.20 | 0.77 | 0    | 0    | 0    |
| <i>Phascolarctobacterium</i>            | 0.34 | 0.07 | 0.19 | 0    | 0    | 0    |
| <i>Parasporobacterium</i>               | 0.29 | 0    | 0    | 0    | 0    | 0    |
| <i>Catonella</i>                        | 0.29 | 0    | 0    | 0    | 0    | 0    |
| <i>Odoribacter</i>                      | 0.23 | 0    | 0    | 0    | 0    | 0    |
| <i>Acinetobacter</i>                    | 0.11 | 0    | 0    | 0    | 0    | 0    |
| <i>Anaerobacter</i>                     | 0.11 | 0    | 0    | 0    | 0    | 0    |
| <i>Haemophilus</i>                      | 0.11 | 0    | 0    | 0    | 0    | 0    |
| <i>Sporacetigenium</i>                  | 0.11 | 0    | 0    | 0    | 0    | 0    |

|                                        |      |      |      |   |   |   |
|----------------------------------------|------|------|------|---|---|---|
| <i>Sporobacterium</i>                  | 0.06 | 0.34 | 0    | 0 | 0 | 0 |
| <i>Turcibacter</i>                     | 0.06 | 0    | 0    | 0 | 0 | 0 |
| <i>Anaerospobacter</i>                 | 0    | 1.79 | 8.44 | 0 | 0 | 0 |
| <i>Pyramidobacter</i>                  | 0    | 0.55 | 1.34 | 0 | 0 | 0 |
| <i>Pantoea</i>                         | 0    | 0    | 0.96 | 0 | 0 | 0 |
| <i>Anaerostipes</i>                    | 0    | 0    | 0.67 | 0 | 0 | 0 |
| <i>Dialister</i>                       | 0    | 0    | 0.58 | 0 | 0 | 0 |
| <b>unclassified Enterobacteriaceae</b> | 0    | 0    | 0.29 | 0 | 0 | 0 |
| <i>Enterobacter</i>                    | 0    | 0    | 0.29 | 0 | 0 | 0 |
| <i>Solobacterium</i>                   | 0    | 0    | 0.19 | 0 | 0 | 0 |
| <i>Providencia</i>                     | 0    | 0.28 | 0.10 | 0 | 0 | 0 |
| <i>Cronobacter</i>                     | 0    | 0    | 0.10 | 0 | 0 | 0 |
| <i>Anaerovorax</i>                     | 0    | 1.92 | 0    | 0 | 0 | 0 |
| <i>Ruminococcus</i>                    | 0    | 1.03 | 0    | 0 | 0 | 0 |
| <i>Lawsonia</i>                        | 0    | 0.14 | 0    | 0 | 0 | 0 |
| <i>Erysipelothrix</i>                  | 0    | 0.14 | 0    | 0 | 0 | 0 |
| <i>Holdemania</i>                      | 0    | 0.14 | 0    | 0 | 0 | 0 |
| <i>Akkermansia</i>                     | 0    | 0.07 | 0    | 0 | 0 | 0 |
| <i>Anaerotruncus</i>                   | 0    | 0.07 | 0    | 0 | 0 | 0 |
| <i>Pseudobutyrvibrio</i>               | 0    | 0.07 | 0    | 0 | 0 | 0 |

46 <sup>a</sup>Results are expressed as the percentage of specified sequence in total bacterial  
47 sequences. The phylogenetic assignment was based on RDP Classifier.

48 <sup>b</sup>HU and CH represent inocula of human feces and chicken cecal contents. HFVI,  
49 HFVL, CFVI and CFVL represent chemostat products of human fecal and chicken  
50 cecal microbiota grown in VI and VL media.

51 **Table S5 Comparison of post-ileal digestibility of major nutrients from chicken and human samples<sup>&</sup>.**

| Samples                                | Dry matter             |        | Crude protein                         |       | Starch    |       | NSP <sup>×</sup> |       | Sugars    |       |
|----------------------------------------|------------------------|--------|---------------------------------------|-------|-----------|-------|------------------|-------|-----------|-------|
|                                        | Chicken                | Human  | Chicken                               | Human | Chicken   | Human | Chicken          | Human | Chicken   | Human |
| Terminal ileal<br>(g d <sup>-1</sup> ) | 20.3±0.13 <sup>§</sup> | 101.30 | 2.51±0.05                             | 17.20 | 1.37±0.06 | 1.30  | 0.17±0.01        | 23.30 | 4.02±0.04 | 20.8  |
| Feces (g d <sup>-1</sup> )             | 17.8±0.15              | 34.10  | 0.30±0.04<br>(1.92±0.09) <sup>¥</sup> | 9.80  | 0.88±0.08 | 0.30  | 0.09±0.01        | 8.30  | 0.48±0.05 | 0.4   |
| Post-ileal<br>digestibility<br>(%)     | 12.32                  | 66.34  | 88.05<br>(23.51) <sup>¥</sup>         | 43.02 | 35.77     | 76.92 | 47.06            | 64.38 | 88.06     | 98.08 |

52 <sup>&</sup> All data for chicken are shown as mean and SD, n=18. The post-ileal digestibility was calculated as the difference between the terminal ileal  
53 output (g d<sup>-1</sup>) and feces (g d<sup>-1</sup>) relative to the terminal ileal output (g d<sup>-1</sup>). All data for humans were cited by Coles *et al.* (3).

54 <sup>§</sup>The daily ileal output in dry matter for adult chickens is predicted with the daily total dry matter in excreta plus 2.5 gram based on a previous  
55 study on intact and cecectomized adult chickens (10).

56 <sup>¥</sup>The data outside of the brackets represent true protein, excluding non-protein nitrogen (uric acid). The data inside the brackets represent the  
57 crude protein, including both protein and non-protein nitrogen.

58 <sup>×</sup>Non-starch polysaccharides.

59 **Table S6 Molar ratios of VFA in chemostats, SHIME<sup>§</sup> or batch fermentation inoculated with human fecal microbiota studied by different**  
60 **countries.**

| Carbohydrates (%)                                                                           | Techniques         | Inocula source | Acetate | Propionate | Butyrate | Reference                   |
|---------------------------------------------------------------------------------------------|--------------------|----------------|---------|------------|----------|-----------------------------|
| starch 0.2; pectin 0.05; inulin 0.05; xylan 0.05; arabinogalactan 0.05; guar gum 0.05       | chemostats         | British        | 70      | 17         | 13       | (7)                         |
|                                                                                             |                    |                | 83      | 9          | 8        |                             |
| starch 0.3, arabinogalactan 0.1, pectin 0.2, xylan 0.1, glucose 0.04                        | SHIME <sup>§</sup> | American       | 51      | 15         | 22       | (4)                         |
| starch 0.2; pectin 0.05; Raftiline LS 0.05; xylan 0.05; arabinogalactan 0.05; guar gum 0.05 | chemostats         | British        | 61      | 24         | 15       | (2)                         |
| Konjac glucomannan (KGM) 0.2%                                                               | Batch fermentation | Japanese       | 50      | 30         | 13       | (9)                         |
| carrageenan oligosaccharides (KCO) 0.8%                                                     | chemostats         | Chinese        | 44      | 40         | 16       | Unpublished data in our lab |
| carrageenan oligosaccharides (KCO) 0.8%                                                     | Batch fermentation | Chinese        | 53      | 29         | 18       | Unpublished data in our lab |

61

62 <sup>§</sup>SHIME was represent for Simulator of the Human Intestinal Microbial Ecosystem.

## Appendix

63

64 The sequence of the phylotype of unclassified *Lachnospiraceae* coming from human  
65 microbiota which was enriched in the VL medium *in vitro* chemostat system.

66 >the phylotype

67 CCTACGGGAGGCAGCAGTGGGGAATATTGGACAATGGGCGAAAGCCTGAT

68 CCAGCGACGCCGCGTGAGTGAAGAAGTATTTTCGGTATGTAAAGCTCTATCA

69 GCAGGGAAGAAAATGACGGTACCTGACTAAGAAGCCCCGGCTAACTACGT

70 GCCAGCAGCCGCGGTAAT

71

## 72 Supplementary references

73 1. **Bartosch, S., A. Fite, G. T. Macfarlane, and M. E. McMurdo.** 2004. Characterization of  
74 bacterial communities in feces from healthy elderly volunteers and hospitalized elderly  
75 patients by using real-time PCR and effects of antibiotic treatment on the fecal microbiota.  
76 *Appl. Environ. Microbiol.* **70**:3575-3581.

77 2. **Child, M. W., A. Kennedy, A. W. Walker, B. Bahrami, S. Macfarlane, and G. T.**  
78 **Macfarlane.** 2006. Studies on the effect of system retention time on bacterial populations  
79 colonizing a three-stage continuous culture model of the human large gut using FISH  
80 techniques. *FEMS Microbiol. Ecol.* **55**:299-310.

81 3. **Coles, L. T., P. J. Moughan, A. Awati, A. J. Darragh, and M. L. Zou.** 2010. Predicted  
82 apparent digestion of energy-yielding nutrients differs between the upper and lower digestive  
83 tracts in rats and humans. *J. Nutr.* **140**:469-476.

84 4. **De Boever, P., B. Deplancke, and W. Verstraete.** 2000. Fermentation by gut microbiota  
85 cultured in a simulator of the human intestinal microbial ecosystem is improved by  
86 supplementing a soygerm powder. *J. Nutr.* **130**:2599-2606.

87 5. **Denman, S. E., and C. S. McSweeney.** 2006. Development of a real-time PCR assay for  
88 monitoring anaerobic fungal and cellulolytic bacterial populations within the rumen. *FEMS*  
89 *Microbiol. Ecol.* **58**:572-582.

90 6. **Frank, J. A., C. I. Reich, S. Sharma, J. S. Weisbaum, B. A. Wilson, and G. J. Olsen.** 2008.  
91 Critical evaluation of two primers commonly used for amplification of bacterial 16S rRNA  
92 genes. *Appl. Environ. Microbiol.* **74**:2461-2470.

93 7. **Macfarlane, S., E. J. Woodmansey, and G. T. Macfarlane.** 2005. Colonization of mucin by  
94 human intestinal bacteria and establishment of biofilm communities in a two-stage continuous  
95 culture system. *Appl. Environ. Microbiol.* **71**:7483-7492.

96 8. **Matsuki, T., K. Watanabe, J. Fujimoto, Y. Miyamoto, T. Takada, K. Matsumoto, H.**

- 97           **Oyaizu, and R. Tanaka.** 2002. Development of 16S rRNA-gene-targeted group-specific  
98 primers for the detection and identification of predominant bacteria in human feces. *Appl.*  
99 *Environ. Microbiol.* **68**:5445-5451.
- 100    9.       **Matsuura, Y.** 1998. Degradation of konjac glucomannan by enzymes in human feces and  
101 formation of short-chain fatty acids by intestinal anaerobic bacteria. *J. Nutr. Sci. Vitaminol.*  
102 (Tokyo) **44**:423-436.
- 103    10.     **Rezvani, M. R.** 2007. Standardisation of precaecal and total tract amino acid digestibility  
104 measurement in laying hens Martin Luther University, Halle Wittenberg.
- 105    11.     **Rinttila, T., A. Kassinen, E. Malinen, L. Krogius, and A. Palva.** 2004. Development of an  
106 extensive set of 16S rDNA-targeted primers for quantification of pathogenic and indigenous  
107 bacteria in faecal samples by real-time PCR. *J. Appl. Microbiol.* **97**:1166-1177.
- 108
- 109
